# Supplementary material for: Disability and schizophrenia: a systematic review of experienced psychosocial difficulties
Source: PubMed Central journal article supplement (PMC3539983; doi:10.1186/1471-244x-12-193), 2012-11-09
Supplement: 1471-244X-12-193-S4.pdf [file 1471-244X-12-193-S4.pdf]

## Additional File 4

Supplementary Table S2 Variables associated with the intensity or course of the 10 most frequently studied PSD categories

| ASSOCIATED<br>VARIABLES**                        | PSYCHOSOCIAL DIFFICULTY        |                             |                        |                              |                                |                        |            |                     |                                  |                   |
|--------------------------------------------------|--------------------------------|-----------------------------|------------------------|------------------------------|--------------------------------|------------------------|------------|---------------------|----------------------------------|-------------------|
|                                                  | Psychopathological<br>symptoms | Disability/<br>Functioning* | Emotional<br>functions | Relationships<br>with others | Quality of life/<br>Wellbeing* | Cognitive<br>functions | Employment | Energy<br>and drive | Looking<br>after ones'<br>health | Health<br>status* |
| <b>Accessibility</b>                             |                                |                             |                        | + (1)                        |                                |                        |            |                     |                                  |                   |
| <b>Adherence to<br/>treatment</b>                | + (3)                          | + (2)                       |                        | + (1)                        | + (5)                          | + (1)                  |            |                     |                                  |                   |
| <b>Attitude towards<br/>treatment (positive)</b> | + (1)                          | + (1)                       |                        |                              | + (1)                          | + (1)                  |            |                     | + (1)                            |                   |
| <b>Body weight</b>                               | - (1)                          |                             |                        |                              | - (1)                          |                        |            |                     |                                  |                   |
| <b>Cognitive functions</b>                       |                                |                             |                        |                              |                                |                        |            |                     |                                  |                   |
| in general                                       |                                | + (1)<br>+0 (1)             |                        |                              | - (1)                          | +/- (1)<br>-0 (1)      | + (1)      |                     |                                  |                   |
| executive functions                              |                                | +0 (1)                      |                        |                              |                                |                        | + (1)      |                     |                                  |                   |
| insight                                          | + (1)                          | + (1)                       |                        | + (1)                        |                                |                        |            |                     |                                  |                   |
| language                                         |                                | +0 (1)                      |                        |                              |                                |                        |            |                     |                                  |                   |
| memory                                           |                                | + (1)<br>+0 (1)             |                        | + (1)                        |                                |                        | + (2)      |                     |                                  |                   |
| <b>Communication<br/>difficulties</b>            |                                |                             |                        | - (1)                        |                                |                        |            |                     |                                  |                   |
| <b>Comorbidities</b>                             |                                |                             |                        |                              |                                |                        |            |                     |                                  |                   |
| physical comorbidity                             | -0 (1)                         | + (1)<br>- (1)              |                        |                              | - (1)                          | + (1)                  |            |                     |                                  | +0 (1)            |
| substance abuse                                  | - (1)                          | - (1)                       |                        |                              | - (1)                          | + (1)                  |            |                     |                                  |                   |
| <b>Demographics</b>                              |                                |                             |                        |                              |                                |                        |            |                     |                                  |                   |
| age                                              |                                | - (2)                       |                        | +0 (1)<br>- (2)              | - (1)                          |                        |            |                     |                                  |                   |
| gender (male)                                    | - (2)                          | - (4)<br>-0 (1)             | - (1)                  | - (1)<br>-0 (3)              | - (1)                          | - (1)                  | - (2)      | - (1)               |                                  | - (1)             |
| marital status<br>(married)                      |                                | + (2)                       |                        | +/- (1)                      | +0 (1)                         |                        | + (1)      |                     |                                  |                   |

| ASSOCIATED VARIABLES**                           | PSYCHOSOCIAL DIFFICULTY     |                          |                     |                           |                             |                     |                    |                  |                            |                    |
|--------------------------------------------------|-----------------------------|--------------------------|---------------------|---------------------------|-----------------------------|---------------------|--------------------|------------------|----------------------------|--------------------|
|                                                  | Psychopathological symptoms | Disability/ Functioning* | Emotional functions | Relationships with others | Quality of life/ Wellbeing* | Cognitive functions | Employment         | Energy and drive | Looking after ones' health | Health status*     |
| educational level                                |                             | + (1)<br>+ / 0 (1)       |                     | + / - (1)                 |                             | + / 0 (1)           | + / 0 (1)          |                  |                            | + / 0 (1)          |
| employment status (employed)                     | + (2)                       | + (6)                    |                     | + / 0 (1)                 | + (4)<br>+ / 0 (1)          |                     | + (4)              |                  |                            | + (1)              |
| disability benefits                              |                             |                          |                     |                           |                             |                     | - (1)              |                  |                            |                    |
| social economic status                           |                             | + (1)                    |                     | + (1)                     |                             |                     |                    |                  |                            | + (1)              |
| urban residence                                  |                             | - (1)                    |                     | - / 0 (1)                 |                             |                     |                    |                  |                            |                    |
| independent living                               | + (1)                       | + (3)                    |                     |                           | + (1)                       |                     |                    |                  |                            |                    |
| residential placement                            | + / - (1)                   | - / 0 (1)                |                     | - / 0 (1)                 | - / 0 (1)                   |                     |                    |                  |                            | - / 0 (1)          |
| living alone                                     |                             |                          |                     | - / 0 (2)                 |                             |                     |                    |                  |                            | - / 0 (1)          |
| country of residence (Germany vs. UK and France) |                             | + / 0 (1)                |                     | + / 0 (2)                 |                             |                     |                    |                  |                            | + / 0 (1)          |
| <b>Dependent behaviour</b>                       |                             |                          |                     | - (1)                     |                             |                     |                    |                  |                            |                    |
| <b>Disability/ Functioning</b>                   |                             |                          |                     |                           |                             |                     |                    |                  |                            |                    |
| lesser disability/better global functioning      | + (3)                       | + (2)                    | + (1)               | + (1)<br>+ / 0 (1)        | + (3)                       | + (1)               | + / 0 (1)          |                  | + (1)                      | + (1)              |
| social functioning                               |                             | + (2)<br>- (1)           |                     | + / 0 (1)                 | + (2)                       |                     |                    |                  |                            | + (1)              |
| <b>Emotional problems</b>                        |                             |                          |                     |                           |                             |                     |                    |                  |                            |                    |
| anxiety                                          |                             |                          |                     | - (1)                     | - (1)                       |                     | - (1)              |                  |                            | - / 0 (1)          |
| depression                                       |                             | - (3)                    |                     | - (3)                     | - (2)                       |                     | - (3)<br>- / 0 (1) |                  |                            | - (1)<br>- / 0 (2) |
| feelings of stress                               |                             |                          |                     |                           | - (1)                       |                     |                    |                  |                            |                    |
| flat affect                                      |                             | - (1)                    |                     |                           |                             |                     |                    |                  |                            |                    |
| hostility                                        |                             |                          |                     | - (1)                     |                             |                     |                    |                  |                            |                    |
| <b>Endocrine disturbances</b>                    |                             |                          |                     |                           |                             |                     |                    |                  | - (1)                      |                    |

| ASSOCIATED<br>VARIABLES**                               | PSYCHOSOCIAL DIFFICULTY        |                             |                        |                              |                                |                        |            |                     |                                  |                   |
|---------------------------------------------------------|--------------------------------|-----------------------------|------------------------|------------------------------|--------------------------------|------------------------|------------|---------------------|----------------------------------|-------------------|
|                                                         | Psychopathological<br>symptoms | Disability/<br>Functioning* | Emotional<br>functions | Relationships<br>with others | Quality of life/<br>Wellbeing* | Cognitive<br>functions | Employment | Energy<br>and drive | Looking<br>after ones'<br>health | Health<br>status* |
| <b>Energy and drive</b>                                 |                                |                             |                        |                              |                                |                        |            |                     |                                  |                   |
| motivation                                              |                                |                             |                        | + (1)                        |                                |                        |            |                     |                                  |                   |
| vitality                                                |                                |                             |                        |                              | + (1)                          |                        |            |                     |                                  |                   |
| <b>Family history of<br/>mental illness</b>             |                                |                             | -/0 (1)                |                              |                                |                        |            |                     |                                  |                   |
| <b>Health services use</b>                              |                                |                             |                        |                              |                                |                        |            |                     |                                  |                   |
| duration of treatment                                   |                                |                             |                        |                              | - (1)                          |                        |            |                     |                                  |                   |
| duration of<br>hospitalizations                         |                                | +/- (1)                     |                        |                              |                                |                        | - (1)      |                     |                                  |                   |
| number of<br>hospitalizations                           |                                | - (1)                       |                        |                              |                                |                        |            |                     |                                  |                   |
| <b>Hope</b>                                             |                                |                             |                        | + (1)                        |                                |                        |            |                     |                                  |                   |
| <b>Illness-related<br/>variables</b>                    |                                |                             |                        |                              |                                |                        |            |                     |                                  |                   |
| duration of illness                                     | - (1)                          | - (2)                       |                        |                              | - (2)                          |                        |            |                     |                                  |                   |
| age at illness onset                                    |                                | + (1)                       |                        |                              |                                |                        |            |                     |                                  |                   |
| age at first treatment                                  |                                | - (1)                       |                        |                              | - (1)                          |                        |            |                     |                                  |                   |
| age at first<br>hospitalization                         |                                | + (1)                       |                        |                              |                                |                        |            |                     |                                  |                   |
| age at discharge from<br>hospital                       |                                | - (1)                       |                        |                              |                                |                        |            |                     |                                  |                   |
| duration of untreated<br>psychosis                      |                                | - (1)                       |                        | - (1)                        | +/0 (1)                        |                        | - (1)      |                     |                                  | -/0 (1)           |
| stage of illness<br>(earlier)                           | + (1)                          | + (1)                       |                        |                              |                                |                        |            |                     |                                  |                   |
| disorganized or<br>residual subtype of<br>schizophrenia |                                | - (2)                       |                        |                              |                                |                        |            |                     |                                  |                   |
| <b>Location (outside the<br/>home)</b>                  |                                |                             |                        | + (1)                        |                                |                        |            |                     |                                  |                   |
| <b>Obsessive symptoms</b>                               |                                | - (1)                       |                        |                              |                                |                        |            |                     |                                  |                   |
| <b>Participating in<br/>social activities</b>           |                                | + (1)                       |                        |                              | + (1)                          |                        |            |                     |                                  |                   |

| ASSOCIATED<br>VARIABLES**                                  | PSYCHOSOCIAL DIFFICULTY        |                             |                                 |                              |                                 |                        |                    |                     |                                  |                                 |
|------------------------------------------------------------|--------------------------------|-----------------------------|---------------------------------|------------------------------|---------------------------------|------------------------|--------------------|---------------------|----------------------------------|---------------------------------|
|                                                            | Psychopathological<br>symptoms | Disability/<br>Functioning* | Emotional<br>functions          | Relationships<br>with others | Quality of life/<br>Wellbeing*  | Cognitive<br>functions | Employment         | Energy<br>and drive | Looking<br>after ones'<br>health | Health<br>status*               |
| <b>Patient treatment</b>                                   |                                |                             |                                 |                              |                                 |                        |                    |                     |                                  |                                 |
| medication                                                 | + (18)<br>+ / 0 (4)            | + (7)<br>- (2)              | + (5)<br>+ / 0 (4)<br>+ / - (2) | + (3)<br>+ / - (2)           | + (9)<br>+ / 0 (2)<br>+ / - (2) | + (6)<br>+ / 0 (2)     | + (3)              | + (3)<br>- (2)      | + / - (2)                        | + (2)<br>+ / 0 (2)<br>- / 0 (1) |
| psychosocial treatment                                     | + (3)                          | + (3)                       |                                 | + (3)                        | + (1)                           | + (1)<br>+ / - (1)     | + (4)              |                     | + / 0 (1)                        |                                 |
| psychological therapy:<br>cognitive therapy                | + / 0 (1)                      | + (1)                       |                                 |                              |                                 | + (1)<br>+ / 0 (3)     |                    |                     |                                  |                                 |
| psychological therapy:<br>cognitive behavioural<br>therapy | + / 0 (2)                      | + (2)                       | + (1)                           |                              |                                 | + / 0 (3)              | + / 0 (1)          |                     |                                  |                                 |
| day care                                                   |                                |                             |                                 | + (1)                        |                                 |                        |                    |                     |                                  |                                 |
| community-based care                                       | + (1)                          | + (1)                       |                                 |                              |                                 |                        |                    |                     |                                  |                                 |
| alternative treatment                                      | + (1)<br>+ / 0 (2)             | + (2)                       | + (1)<br>+ / 0 (1)              | + / - (1)                    |                                 | + / 0 (1)              |                    |                     |                                  |                                 |
| <b>Psychomotor<br/>disturbances</b>                        |                                | - (1)<br>- / 0 (1)          |                                 | - (1)                        |                                 |                        | - (2)              |                     |                                  |                                 |
| <b>Psychopathological<br/>symptoms</b>                     |                                |                             |                                 |                              |                                 |                        |                    |                     |                                  |                                 |
| global intensity of<br>symptoms                            | - (3)                          | - (5)                       |                                 |                              | - (3)                           | - (1)                  |                    |                     | - (1)                            |                                 |
| negative symptoms                                          | - (1)                          | - (1)                       |                                 | - (1)<br>- / 0 (1)           | - (3)                           | - (1)<br>- / 0 (1)     | + / 0 (1)<br>- (1) |                     |                                  | - (1)                           |
| positive symptoms                                          | - (1)<br>- / 0 (1)             | - (2)<br>- / 0 (1)          | - (1)                           | - (3)<br>- / 0 (1)           | + (1)<br>- (3)                  |                        | - (1)<br>- / 0 (1) |                     | - (1)                            | - / 0 (1)                       |
| general<br>psychopathology                                 |                                | - / 0 (1)                   |                                 | + / 0 (1)                    |                                 |                        |                    |                     |                                  |                                 |
| <b>Psychopathy traits</b>                                  |                                |                             |                                 | - (1)                        |                                 |                        |                    |                     |                                  |                                 |
| <b>Quality of life/<br/>Wellbeing</b>                      |                                |                             |                                 |                              |                                 |                        |                    |                     |                                  |                                 |
| quality of life                                            | + (1)                          | + (1)                       |                                 |                              |                                 |                        |                    |                     | + (1)                            |                                 |
| wellbeing                                                  | + (2)                          | - (1)                       |                                 |                              | + (3)                           |                        |                    |                     | + (1)                            |                                 |

| ASSOCIATED VARIABLES**                        | PSYCHOSOCIAL DIFFICULTY     |                          |                     |                           |                             |                     |            |                  |                            |                |
|-----------------------------------------------|-----------------------------|--------------------------|---------------------|---------------------------|-----------------------------|---------------------|------------|------------------|----------------------------|----------------|
|                                               | Psychopathological symptoms | Disability/ Functioning* | Emotional functions | Relationships with others | Quality of life/ Wellbeing* | Cognitive functions | Employment | Energy and drive | Looking after ones' health | Health status* |
| <b>Relationships with others (positive)</b>   |                             |                          |                     |                           |                             |                     |            |                  |                            |                |
| no history of aggressive behaviour in general |                             |                          |                     | + (1)                     |                             |                     |            |                  |                            |                |
| family relationships                          |                             | + (2)                    |                     | +/0 (1)                   | + (1)                       |                     |            |                  |                            |                |
| relationships with health professionals       |                             |                          |                     | +/0 (1)                   |                             |                     |            |                  |                            |                |
| <b>Self-esteem</b>                            |                             |                          |                     |                           | + (1)                       |                     |            |                  |                            |                |
| <b>Sense of meaning</b>                       |                             |                          |                     | + (1)                     |                             |                     |            |                  |                            |                |
| <b>Side effects of medications</b>            | - (1)                       | - (3)                    |                     |                           | - (2)                       | + (1)<br>- (1)      |            |                  |                            | - (1)          |
| <b>Skills</b>                                 |                             |                          |                     |                           |                             |                     | + (1)      |                  |                            |                |
| <b>Social cognition</b>                       |                             |                          |                     | + (1)                     |                             |                     |            |                  |                            |                |
| <b>Social support</b>                         |                             |                          |                     |                           |                             |                     |            |                  |                            |                |
| in general                                    |                             |                          |                     | + (2)                     | + (1)<br>+/0 (1)            |                     |            |                  |                            | +/0 (1)        |
| family support                                |                             |                          |                     |                           |                             |                     |            |                  |                            | + (1)          |
| friend support                                |                             |                          |                     |                           | + (1)                       |                     |            |                  |                            |                |
| <b>Support for caregivers</b>                 |                             |                          |                     |                           |                             |                     |            |                  |                            |                |
| in general                                    | + (1)                       | + (1)                    |                     | + (1)                     |                             |                     | + (1)      |                  |                            | + (1)          |
| education                                     | + (2)                       | + (5)                    |                     | +/0 (1)                   |                             |                     |            |                  |                            |                |
| mutual support                                |                             | + (1)                    |                     |                           |                             |                     |            |                  |                            |                |
| <b>Task-oriented coping</b>                   |                             |                          |                     |                           | + (1)                       |                     |            |                  |                            |                |
| <b>Transportation</b>                         |                             |                          |                     |                           |                             |                     | + (1)      |                  |                            |                |
| <b>Trust in others</b>                        |                             |                          |                     | + (1)                     |                             |                     |            |                  |                            |                |
| <b>Year of discharge (1980s vs. 1990s)</b>    |                             |                          |                     |                           |                             | - (1)               | + (1)      |                  |                            |                |

\* Global scores or global concepts closely related to PSDs.

\*\* It can be noticed that on several occasions PSD categories and their related factors are the same. This occurred when: 1) PSDs and factors associated with them, although not identical, in the process of data extraction and analysis were classified under the same general categories; 2) PSDs at some point in time were predicted by their previous (e.g. baseline or premorbid) levels.

Type of association with PSDs:

- + denotes association with positive outcomes, i.e. with lesser intensity of PSDs or with PSDs improvement over time;
- denotes association with negative outcomes, i.e. with greater intensity of PSDs or with PSDs deterioration over time;
- +/0 denotes partial association with positive outcomes;
- /0 denotes partial association with negative outcomes;
- +/- denotes association with both positive and negative outcomes within the same psychosocial area.

An association was regarded as partial if: 1). was found only in a subgroup of participants; or 2). a variable was found to be associated with some, but not all aspects of a given PSD category (e.g. with “cognitive functions: attention”, but not with “cognition functions: memory”); or 3). a variable was associated with some, but not all measures of the same PSD; or 4). some, but not all associated variables, which in a single study were classified under the same category (e.g. various neuroleptics falling under one common category: “patient treatment: medication”) were found to be significantly related to a given PSD category.

Numbers in brackets denote numbers of studies in which a given type of association was found.
